# Supplementary material for: Disinfectant and Antimicrobial Susceptibility Studies of Staphylococcus aureus Strains and ST398-MRSA and ST5-MRSA Strains from Swine Mandibular Lymph Node Tissue, Commercial Pork Sausage Meat and Swine Feces
Source: MDPI journal article supplement (doi:10.3390/microorganisms9112401), 2021-11-22
Supplement: s1 [file s1]

**Table S4.** Distribution of disinfectant and disinfectant component susceptibility profiles for the 7 MRSA strains isolated from swine mandibular lymph node tissue and commercial pork sausage meat.

| MRSA Strains | Disinfectant* (µg/mL) |     |     |     |      |      |      |     |    |    |     |     |    |      |      |     |      |    |      |     |     |     |     |     |
|--------------|-----------------------|-----|-----|-----|------|------|------|-----|----|----|-----|-----|----|------|------|-----|------|----|------|-----|-----|-----|-----|-----|
|              | DCR                   | T-T | CC  | Chl | Tric | TCC  | P128 | BKC | PI | FS | F25 | FS5 | OB | CPB  | CPC  | CDE | CTAB | C8 | C10  | C12 | C14 | C16 | THN | Fom |
| <b>21L</b>   | 32†                   | 64  | 512 | 0.5 | 0.12 | 0.5  | 2    | 4   | ‡  | 8  | 4   | 2   | 32 | 4    | 4    | 4   | 4    | 16 | 1    | 8   | 2   | 1   | 256 | 64  |
| <b>38L</b>   | 8                     | 128 | 64  | 0.5 | 0.25 | 0.25 | 0.5  | 1   | ‡  | .5 | 0.5 | 1   | 1  | 0.25 | 0.25 | 0.5 | 1    | 2  | 0.25 | 2   | 0.5 | 0.5 | 256 | 64  |
| <b>147L</b>  | 32                    | 32  | 512 | 0.5 | 0.12 | 0.25 | 1    | 4   | §  | 2  | 2   | 2   | 4  | 4    | 4    | 4   | 4    | 16 | 1    | 8   | 2   | 2   | 256 | 64  |
| <b>150L</b>  | 32                    | 64  | 256 | 0.5 | 0.12 | 0.25 | 1    | 4   | §  | 2  | 2   | 2   | 2  | 4    | 4    | 4   | 4    | 16 | 1    | 8   | 4   | 1   | 256 | 64  |
| <b>D15</b>   | 32                    | 32  | 512 | 0.5 | 0.06 | 0.25 | 2    | 4   | §  | 2  | 2   | 2   | 4  | 4    | 4    | 8   | 8    | 16 | 1    | 8   | 4   | 2   | 256 | 64  |
| <b>D16a</b>  | 16                    | 32  | 128 | 0.5 | 0.12 | 0.25 | 2    | 4   | §  | 2  | 2   | 2   | 2  | 4    | 4    | 4   | 4    | 8  | 2    | 8   | 2   | 2   | 256 | 64  |
| <b>D16</b>   | 16                    | 32  | 128 | 1   | 0.12 | 0.25 | 2    | 4   | §  | 2  | 2   | 2   | 2  | 4    | 4    | 4   | 8    | 8  | 1    | 8   | 2   | 1   | 256 | 64  |

\*Disinfectant and disinfectant component abbreviations: BKC, benzalkonium chloride; CC, CaviCide<sup>CP</sup>; Chl, Novasan Solution<sup>CP</sup>; CPB, cetylpyridinium bromide hydrate; CPC, cetylpyridinium chloride hydrate; CDE, ethylhexadecyldimethylammonium bromide; CTAB, cetyltrimethylammonium bromide; DCR, DC&R<sup>CP</sup>; FS5, Final Step 512 Sanitizer<sup>CP</sup>; Fom, formaldehyde; FS, Food Service Sanitizer<sup>CP</sup>; F25, F-25 Sanitizer<sup>CP</sup>; PI, providone-iodine<sup>CP</sup>; C8, dioctyldimethylammonium chloride; C10, didecyldimethylammonium chloride; C12, benzyldimethyldodecylammonium chloride; C14, benzyldimethyltetradecylammonium chloride; C16, benzyldimethylhexadecylammonium chloride; P128, P-128<sup>CP</sup>; OB, OdoBan<sup>CP</sup>; TCC, triclocarban; THN, tris(hydroxymethyl)nitromethane; Tric, triclosan; T-T, Tek-Trol<sup>CP</sup>; and <sup>CP</sup> = commercial product. †The numbers highlighted in yellow show the elevated disinfectant MICs for the 7 MRSA strains. ‡The MIC for providone-iodine<sup>CP</sup> (PI) is 2048 µg/mL. §The MIC for providone-iodine<sup>CP</sup> (PI) is 4096 µg/mL.
