# Supplementary material for: Disinfectant and Antimicrobial Susceptibility Studies of Staphylococcus aureus Strains and ST398-MRSA and ST5-MRSA Strains from Swine Mandibular Lymph Node Tissue, Commercial Pork Sausage Meat and Swine Feces
Source: MDPI journal article supplement (doi:10.3390/microorganisms9112401), 2021-11-22
Supplement: s1 [file s1]

**Table S6.** Distribution of disinfectant and disinfectant component susceptibility profiles for 52 *Staphylococcus aureus* strains isolated from commercial pork sausage meat. MIC = minimum inhibition concentration.

| Disinfectant*          | MIC (µg/mL) |       |      |       |       |      |     |     |    |     |    |    |    |    |     |     |     |      |      |      | MIC <sub>50</sub><br>µg/mL | MIC <sub>90</sub><br>µg/mL |
|------------------------|-------------|-------|------|-------|-------|------|-----|-----|----|-----|----|----|----|----|-----|-----|-----|------|------|------|----------------------------|----------------------------|
|                        | .008        | .0156 | .031 | .0625 | 0.125 | 0.25 | 0.5 | 1   | 2  | 4   | 8  | 16 | 32 | 64 | 128 | 256 | 512 | 1024 | 2048 | 4096 | 8192                       |                            |
| DC&R <sup>CP</sup>     |             |       |      |       |       |      |     |     |    | 10† | 32 | 4‡ | 6  |    |     |     |     |      |      |      | 8                          | 32                         |
| Tek-Trol <sup>CP</sup> |             |       |      |       |       |      |     |     |    |     |    |    | 18 | 34 |     |     |     |      |      |      | 64                         | 64                         |
| CaviCide <sup>CP</sup> |             |       |      |       |       |      |     |     |    |     |    |    |    | 8  | 36  | 5   | 3   |      |      |      | 128                        | 256                        |
| Chlorhexidine§         |             |       |      |       |       |      | 23  | 29¶ |    |     |    |    |    |    |     |     |     |      |      |      | 1¶                         | 1                          |
| Triclosan              |             |       |      | 3     | 22    | 21   | 6   |     |    |     |    |    |    |    |     |     |     |      |      |      | 0.25                       | 0.5                        |
| TCC                    |             |       |      |       | 7     | 39   | 6   |     |    |     |    |    |    |    |     |     |     |      |      |      | 0.25                       | 0.5                        |
| P-128 <sup>CP</sup>    |             |       |      |       |       | 1    | 26  | 16  | 9  |     |    |    |    |    |     |     |     |      |      |      | 0.5                        | 2                          |
| BKC                    |             |       |      |       |       |      |     | 25  | 16 | 10  | 1  |    |    |    |     |     |     |      |      |      | 2                          | 4                          |
| P-I                    |             |       |      |       |       |      |     |     |    |     |    |    |    |    |     |     |     | 1    | 14   | 37   | 4096                       | 4096                       |
| FSS                    |             |       |      |       |       |      | 14  | 26  | 11 | 1   |    |    |    |    |     |     |     |      |      |      | 1                          | 2                          |
| F25                    |             |       |      |       |       |      | 19  | 22  | 10 | 1   |    |    |    |    |     |     |     |      |      |      | 1                          | 2                          |
| FS512                  |             |       |      |       |       |      | 16  | 26  | 10 |     |    |    |    |    |     |     |     |      |      |      | 1                          | 2                          |
| OdoBan <sup>CP</sup>   |             |       |      |       |       |      | 8   | 32  | 8  | 3   | 1  |    |    |    |     |     |     |      |      |      | 1                          | 2                          |
| CPB                    |             |       |      |       |       | 18   | 23  | 1   | 1  | 9   |    |    |    |    |     |     |     |      |      |      | 0.5                        | 4                          |
| CPC                    |             |       |      |       | 1     | 15   | 23  | 3   |    | 10  |    |    |    |    |     |     |     |      |      |      | 0.5                        | 4                          |
| CDEAB                  |             |       |      | 1     |       | 1    | 25  | 15  |    | 9   | 1  |    |    |    |     |     |     |      |      |      | 0.5                        | 4                          |
| CTAB                   |             |       |      |       |       | 1    | 6   | 33  | 2  | 7   | 3  |    |    |    |     |     |     |      |      |      | 1                          | 4                          |
| C8AC**                 |             |       |      |       |       |      |     |     | 1  | 41  | 3  | 7  |    |    |     |     |     |      |      |      | 4                          | 16                         |
| C10AC**                |             |       |      |       |       | 11   | 29  | 5   | 7  |     |    |    |    |    |     |     |     |      |      |      | 0.5                        | 2                          |
| C12BAC**               |             |       |      |       |       |      |     | 1   | 40 | 1   | 10 |    |    |    |     |     |     |      |      |      | 2                          | 8                          |
| C14BAC**               |             |       |      |       |       |      | 6   | 36  | 6  | 4   |    |    |    |    |     |     |     |      |      |      | 1                          | 2                          |
| C16BAC**               |             |       |      |       |       | 1    | 34  | 8   | 9  |     |    |    |    |    |     |     |     |      |      |      | 0.5                        | 2                          |
| THN**                  |             |       |      |       |       |      |     |     |    |     |    |    |    |    | 2   | 45  | 4   | 1    |      |      | 256                        | 256                        |
| Formaldehyde**         |             |       |      |       |       |      |     |     |    |     |    |    | 1  | 51 |     |     |     |      |      |      | 64                         | 64                         |

\*Disinfectant and disinfectant component abbreviations: BKC, benzalkonium chloride; chlorhexidine, Novasan Solution<sup>CP</sup>; CPB, cetylpyridinium bromide hydrate; CPC, cetylpyridinium chloride hydrate; CDEAB, ethylhexadecyldimethylammonium bromide; CTAB, cetyltrimethylammonium bromide; FS512, Final Step 512 Sanitizer<sup>CP</sup>; FSS, Food Service Sanitizer<sup>CP</sup>; F25, F-25 Sanitizer<sup>CP</sup>; P-I, providone-iodine<sup>CP</sup>; C8AC, dioctyldimethylammonium chloride; C10AC, didecyldimethylammonium chloride; C12BAC, benzyldimethyldodecylammonium chloride; C14BAC, benzyldimethyltetradecylammonium chloride; C16BAC, benzyldimethylhexadecylammonium chloride; TCC, triclocarban; THN, tris(hydroxymethyl)nitromethane; and <sup>CP</sup> = commercial product. †Number of strains at this MIC. ‡The numbers highlighted in yellow show the MICs for 6 of 7 MRSA strains. §MICs ≥1 µg/mL are considered resistant to chlorhexidine [111]. ¶The entries in **red** indicate resistance. \*\*This entry is a disinfectant component.
