# Supplementary material for: Disinfectant and Antimicrobial Susceptibility Studies of Staphylococcus aureus Strains and ST398-MRSA and ST5-MRSA Strains from Swine Mandibular Lymph Node Tissue, Commercial Pork Sausage Meat and Swine Feces
Source: MDPI journal article supplement (doi:10.3390/microorganisms9112401), 2021-11-22
Supplement: s1 [file s1]

**Table S5.** Distribution of disinfectant and disinfectant component susceptibility profiles for 49 *Staphylococcus aureus* strains isolated from swine mandibular lymph node tissue. MIC = minimum inhibition concentration.

|                        | MIC (µg/mL) |       |      |       |       |      |     |     |    |    |    |    |    |    |     |     |     |      |      |      | MIC <sub>50</sub> | MIC <sub>90</sub> |       |
|------------------------|-------------|-------|------|-------|-------|------|-----|-----|----|----|----|----|----|----|-----|-----|-----|------|------|------|-------------------|-------------------|-------|
| Disinfectant*          | .008        | .0156 | .031 | .0625 | 0.125 | 0.25 | 0.5 | 1   | 2  | 4  | 8  | 16 | 32 | 64 | 128 | 256 | 512 | 1024 | 2048 | 4096 | 8192              | µg/mL             | µg/mL |
| DC&R <sup>CP</sup>     |             |       |      |       |       |      |     |     | 2† | 16 | 21 | 2  | 8‡ |    |     |     |     |      |      |      |                   | 8                 | 32    |
| Tek-Trol <sup>CP</sup> |             |       |      |       |       |      |     |     |    |    |    |    | 16 | 19 | 14  |     |     |      |      |      |                   | 64                | 128   |
| CaviCide <sup>CP</sup> |             |       |      |       |       |      |     |     |    |    |    |    | 2  | 19 | 19  | 7   | 2   |      |      |      |                   | 128               | 256   |
| Chlorhexidine§         |             |       |      |       |       |      | 36  | 13¶ |    |    |    |    |    |    |     |     |     |      |      |      |                   | 0.5               | 1¶    |
| Triclosan              | 1           |       | 4    | 8     | 22    | 13   | 1   |     |    |    |    |    |    |    |     |     |     |      |      |      |                   | 0.125             | 0.25  |
| TCC                    |             |       |      | 1     | 8     | 33   | 7   |     |    |    |    |    |    |    |     |     |     |      |      |      |                   | 0.5               | 0.5   |
| P-128 <sup>CP</sup>    |             |       |      |       |       |      | 38  | 7   | 4  |    |    |    |    |    |     |     |     |      |      |      |                   | 0.5               | 1     |
| BKC                    |             |       |      |       |       |      | 3   | 29  | 10 | 6  | 1  |    |    |    |     |     |     |      |      |      |                   | 1                 | 4     |
| P-I                    |             |       |      |       |       |      |     |     |    |    |    |    |    |    |     |     |     |      | 30   | 19   |                   | 2048              | 4096  |
| FSS                    |             |       |      |       |       |      | 18  | 23  | 5  | 1  | 2  |    |    |    |     |     |     |      |      |      |                   | 1                 | 2     |
| F25                    |             |       |      |       |       |      | 23  | 19  | 6  | 1  |    |    |    |    |     |     |     |      |      |      |                   | 1                 | 2     |
| FS512                  |             |       |      |       |       |      | 15  | 27  | 6  | 1  |    |    |    |    |     |     |     |      |      |      |                   | 1                 | 2     |
| OdoBan <sup>CP</sup>   |             |       |      |       |       |      | 11  | 31  | 3  | 3  |    |    | 1  |    |     |     |     |      |      |      |                   | 1                 | 2     |
| CPB                    |             |       |      |       | 1     | 15   | 26  |     |    | 7  |    |    |    |    |     |     |     |      |      |      |                   | 0.5               | 4     |
| CPC                    |             |       |      |       | 1     | 17   | 22  | 2   |    | 7  |    |    |    |    |     |     |     |      |      |      |                   | 0.5               | 4     |
| CDEAB                  |             |       |      |       | 1     | 2    | 26  | 13  |    | 7  |    |    |    |    |     |     |     |      |      |      |                   | 0.5               | 4     |
| CTAB                   |             |       |      |       |       | 1    | 10  | 31  |    | 5  | 2  |    |    |    |     |     |     |      |      |      |                   | 1                 | 4     |
| C8AC**                 |             |       |      |       |       |      |     |     | 11 | 31 | 2  | 5  |    |    |     |     |     |      |      |      |                   | 4                 | 8     |
| C10AC**                |             |       |      |       |       | 10   | 30  | 8   | 1  |    |    |    |    |    |     |     |     |      |      |      |                   | 0.5               | 1     |
| C12BAC**               |             |       |      |       |       |      |     | 4   | 35 | 3  | 7  |    |    |    |     |     |     |      |      |      |                   | 2                 | 8     |
| C14BAC**               |             |       |      |       |       |      | 14  | 27  | 6  | 2  |    |    |    |    |     |     |     |      |      |      |                   | 1                 | 2     |
| C16BAC**               |             |       |      |       |       | 2    | 40  | 2   | 5  |    |    |    |    |    |     |     |     |      |      |      |                   | 0.5               | 2     |
| THN**                  |             |       |      |       |       |      |     |     |    |    |    |    |    |    |     | 33  | 16  |      |      |      |                   | 256               | 512   |
| Formaldehyde**         |             |       |      |       |       |      |     |     |    |    |    |    | 1  | 48 |     |     |     |      |      |      |                   | 64                | 64    |

\*Disinfectant and disinfectant component abbreviations: BKC, benzalkonium chloride; chlorhexidine, Novasan Solution<sup>CP</sup>; CPB, cetylpyridinium bromide hydrate; CPC, cetylpyridinium chloride hydrate; CDEAB, ethylhexadecyldimethylammonium bromide; CTAB, cetyltrimethylammonium bromide; FS512, Final Step 512 Sanitizer<sup>CP</sup>; FSS, Food Service Sanitizer<sup>CP</sup>; F25, F-25 Sanitizer<sup>CP</sup>; P-I, providone-iodine<sup>CP</sup>; C8AC, dioctyldimethylammonium chloride; C10AC, didecyldimethylammonium chloride; C12BAC, benzyldimethyldodecylammonium chloride; C14BAC, benzyldimethyltetradecylammonium chloride; C16BAC, benzyldimethylhexadecylammonium chloride; TCC, triclocarban; THN, tris(hydroxymethyl)nitromethane; and <sup>CP</sup> = commercial product. †Number of strains at this MIC. ‡The numbers highlighted in yellow show the MICs for 6 of 7 MRSA strains. §MICs ≥1 µg/mL are considered resistant to chlorhexidine [111]. ¶The entries in **red** indicates resistance. \*\*This entry is a disinfectant component.
