# Supplementary material for: Disinfectant and Antimicrobial Susceptibility Studies of Staphylococcus aureus Strains and ST398-MRSA and ST5-MRSA Strains from Swine Mandibular Lymph Node Tissue, Commercial Pork Sausage Meat and Swine Feces
Source: MDPI journal article supplement (doi:10.3390/microorganisms9112401), 2021-11-22
Supplement: s1 [file s1]

**Table S1.** Antimicrobial resistance profiles among 63 *Staphylococcus aureus* strains isolated from swine feces. MIC = minimum inhibition concentration.

| Antimicrobial                                                                               | MIC <sub>50</sub><br>(µg/mL) | MIC <sub>90</sub><br>(µg/mL) | MIC Range<br>(µg/mL) | No. (%)<br>Resistant | Breakpoint |
|---------------------------------------------------------------------------------------------|------------------------------|------------------------------|----------------------|----------------------|------------|
| <b>Aminoglycosides</b>                                                                      |                              |                              |                      |                      |            |
| Gentamicin                                                                                  | ≤ 128                        | ≤ 128                        | ≤ 128 – 128          | 0 (0)                | >500       |
| Kanamycin                                                                                   | ≤ 128                        | ≤ 128                        | ≤ 128                | CDR*                 | ≥64        |
| Streptomycin                                                                                | ≤ 512                        | ≤ 512                        | ≤ 512                | 0 (0)                | ≥1000      |
| <b>Amphenicols</b>                                                                          |                              |                              |                      |                      |            |
| Chloramphenicol                                                                             | 8                            | 16                           | 4 – >32              | 1 (1.6)              | ≥32        |
| <b>Cyclic Lipopeptides</b>                                                                  |                              |                              |                      |                      |            |
| Daptomycin                                                                                  | ≤ 0.25                       | ≤ 0.25                       | ≤ 0.25 – 0.5         | 0 (0)                | >1         |
| <b>Fluoroquinolones</b>                                                                     |                              |                              |                      |                      |            |
| Ciprofloxacin                                                                               | 0.25                         | 0.5                          | 0.25 – 0.5           | 0 (0)                | ≥1         |
| <b>Glycopeptides</b>                                                                        |                              |                              |                      |                      |            |
| Vancomycin                                                                                  | 0.5                          | 1                            | ≤ 0.25 – 1           | 0 (0)                | ≥16        |
| <b>Lincosamides</b>                                                                         |                              |                              |                      |                      |            |
| Lincomycin                                                                                  | >8                           | >8                           | ≤ 1 – >8             | CDR*                 | ≥32        |
| <b>Macrolides</b>                                                                           |                              |                              |                      |                      |            |
| Erythromycin                                                                                | >8                           | >8                           | ≤ 0.25 – >8          | 35 (55.6)            | ≥8         |
| Tylosin Tartrate                                                                            | >32                          | >32                          | 1 – >32              | 35 (55.6)            | ≥20        |
| <b>Nitrofurans</b>                                                                          |                              |                              |                      |                      |            |
| Nitrofurantoin                                                                              | 16                           | 16                           | 16                   | 0 (0)                | ≥128       |
| <b>Oxazolidinones</b>                                                                       |                              |                              |                      |                      |            |
| Linezolid                                                                                   | 2                            | 2                            | ≤ 0.5 – 4            | 0 (0)                | ≥8         |
| <b>Penicillins</b>                                                                          |                              |                              |                      |                      |            |
| Penicillin                                                                                  | >16                          | >16                          | ≤ 0.25 – >16         | 57 (90.5)            | ≥16        |
| <b>Streptogramins</b>                                                                       |                              |                              |                      |                      |            |
| Quinupristin/<br>Dalfopristin                                                               | ≤ 0.5                        | ≤ 0.5                        | ≤ 0.5 – 2            | 1 (1.6)              | ≥4         |
| <b>Tetracyclines</b>                                                                        |                              |                              |                      |                      |            |
| Tetracycline                                                                                | >32                          | >32                          | ≤ 1 – >32            | 45 (71.4)            | ≥16        |
| Tigecycline                                                                                 | 0.25                         | 0.5                          | 0.06 – 0.5           | 0 (0)                | >0.5       |
| <b>Number of <i>S. aureus</i> strains with resistance against the number of antibiotics</b> |                              |                              |                      |                      |            |
| No. of Antibiotics                                                                          | 1                            | 2                            | 3                    | 4                    | 5          |
| No. of Strains (%)                                                                          | 21 (33.3)                    | 7 (11.1)                     | 3 (4.8)              | 31 (49.2)            | 1 (1.6)    |

\*CDR = Cannot Determine Resistance with the Sensititre™ plate CMV3AGPF.
