# Supplementary material for: Disinfectant and Antimicrobial Susceptibility Studies of Staphylococcus aureus Strains and ST398-MRSA and ST5-MRSA Strains from Swine Mandibular Lymph Node Tissue, Commercial Pork Sausage Meat and Swine Feces
Source: MDPI journal article supplement (doi:10.3390/microorganisms9112401), 2021-11-22
Supplement: s1 [file s1]

**Table S3.** Antimicrobial resistance profiles among 52 *Staphylococcus aureus* strains isolated from commercial pork sausage meat. MIC = minimum inhibition concentration.

| Antimicrobial                 | MIC <sub>50</sub><br>(µg/mL)                                                         | MIC <sub>90</sub><br>(µg/mL) | MIC Range<br>(µg/mL) | No. (%)<br>Resistant | Breakpoint |          |         |
|-------------------------------|--------------------------------------------------------------------------------------|------------------------------|----------------------|----------------------|------------|----------|---------|
| <b>Aminoglycosides</b>        |                                                                                      |                              |                      |                      |            |          |         |
| Gentamicin                    | ≤ 128                                                                                | ≤ 128                        | ≤ 128 – 1028         | 1 (1.9)              | >500       |          |         |
| Kanamycin                     | ≤ 128                                                                                | ≤ 128                        | ≤ 128                | CDR*                 | ≥64        |          |         |
| Streptomycin                  | ≤ 512                                                                                | ≤ 512                        | ≤ 512 – 2048         | 2 (3.8)              | ≥1000      |          |         |
| <b>Amphenicols</b>            |                                                                                      |                              |                      |                      |            |          |         |
| Chloramphenicol               | 8                                                                                    | 16                           | 8 – >32              | 2 (3.8)              | ≥32        |          |         |
| <b>Cyclic Lipopeptides</b>    |                                                                                      |                              |                      |                      |            |          |         |
| Daptomycin                    | ≤ 0.25                                                                               | 0.5                          | ≤ 0.25 – 1           | 0 (0)                | >1         |          |         |
| <b>Fluoroquinolones</b>       |                                                                                      |                              |                      |                      |            |          |         |
| Ciprofloxacin                 | 0.5                                                                                  | >4                           | 0.25 – >4            | 12 (23.1)            | ≥1         |          |         |
| <b>Glycopeptides</b>          |                                                                                      |                              |                      |                      |            |          |         |
| Vancomycin                    | 1                                                                                    | 1                            | 0.5 – 32             | 1 (1.9)              | ≥16        |          |         |
| <b>Lincosamides</b>           |                                                                                      |                              |                      |                      |            |          |         |
| Lincomycin                    | >8                                                                                   | >8                           | ≤ 1 – >8             | CDR*                 | ≥32        |          |         |
| <b>Macrolides</b>             |                                                                                      |                              |                      |                      |            |          |         |
| Erythromycin                  | 0.5                                                                                  | >8                           | ≤ 0.25 – >8          | 20 (38.5)            | ≥8         |          |         |
| Tylosin Tartrate              | 2                                                                                    | >32                          | 1 – >32              | 18 (34.6)            | ≥20        |          |         |
| <b>Nitrofurans</b>            |                                                                                      |                              |                      |                      |            |          |         |
| Nitrofurantoin                | 16                                                                                   | 16                           | ≤ 0.25 – 16          | 0 (0)                | ≥128       |          |         |
| <b>Oxazolidinones</b>         |                                                                                      |                              |                      |                      |            |          |         |
| Linesolid                     | 2                                                                                    | 4                            | 2 – 4                | 0 (0)                | ≥8         |          |         |
| <b>Penicillins</b>            |                                                                                      |                              |                      |                      |            |          |         |
| Penicillin                    | >16                                                                                  | >16                          | ≤ 0.25 – >16         | 30 (57.7)            | ≥16        |          |         |
| <b>Streptogramins</b>         |                                                                                      |                              |                      |                      |            |          |         |
| Quinupristin/<br>Dalfopristin | ≤ 0.5                                                                                | 2                            | ≤ 0.5 – 32           | 5 (9.6)              | ≥4         |          |         |
| <b>Tetracyclines</b>          |                                                                                      |                              |                      |                      |            |          |         |
| Tetracycline                  | 32                                                                                   | >32                          | ≤ 1 – >32            | 33 (63.5)            | ≥16        |          |         |
| Tigecycline                   | 0.25                                                                                 | 0.25                         | 0.06 – 0.5           | 0 (0)                | >0.5       |          |         |
|                               | Number of <i>S. aureus</i> strains with resistance against the number of antibiotics |                              |                      |                      |            |          |         |
| No. of Antibiotics            | 0                                                                                    | 1                            | 2                    | 3                    | 4          | 5        | 8       |
| No. of Strains (%)            | 6 (11.5)                                                                             | 13 (25)                      | 12 (23.1)            | 9 (17.3)             | 4 (7.7)    | 7 (13.5) | 1 (1.9) |

\*CDR = Cannot Determine Resistance with the Sensititre™ plate CMV3AGPF.
